# Supplementary material for: Construction of dual-carbon-confined metal sulfide nanocrystals via bio-mimetic reactors enabling superior Fenton-like catalysis
Source: Royal Society of Chemistry journal article supplement (doi:10.1039/d1ta04831g), 2021-01-01
Supplement: d1ta04831g1.pdf [file d1ta04831g1.pdf]

## **Construction of dual-carbon-confined metal sulfide nanocrystals via bio-mimetic reactors enabling superior Fenton-like catalysis**

*Tao Xu, <sup>a</sup> Yanping Long, <sup>a</sup> Chao He, <sup>a</sup> Xin Song, <sup>b</sup> Weifeng Zhao, <sup>a\*</sup> and Changsheng  
Zhao <sup>a,c</sup>*

<sup>a</sup> College of Polymer Science and Engineering, State Key Laboratory of Polymer Materials Engineering, Sichuan University, Chengdu, 610065, People's Republic of China

<sup>b</sup> Department of Materials, Department of Bioengineering and Institute of Biomedical Engineering, Imperial College London, London, SW7 2AZ, United Kingdom

<sup>c</sup> College of Chemical Engineering, Sichuan University, Chengdu, 610065, China

*\* Corresponding author. E-mail: weifeng@scu.edu.cn; zhaoscukth@163.com*

*(Weifeng Zhao)*

*Tel.: +86-28-85400453; Fax: +86-28-85405402.*

## Experimental

### Chemicals

$\kappa$ -Carrageenan, peroxymonosulfate (PMS), tert-butyl alcohol (TBA), p-benzoquinone (pBQ), L-histidine (L-his),  $\beta$ -carotene, 5, 5-dimethyl-1-pyrroline-*N*-oxide (DMPO), 2, 2, 6, 6-tetramethyl-4-piperidinol (TEMP), metal chloride salts (cobalt chloride hexahydrate ( $\text{CoCl}_2 \cdot 6\text{H}_2\text{O}$ ), iron (II) chloride tetrahydrate ( $\text{FeCl}_2 \cdot 4\text{H}_2\text{O}$ ), nickel chloride hexahydrate ( $\text{NiCl}_2 \cdot 6\text{H}_2\text{O}$ ), manganese chloride ( $\text{MnCl}_2$ ) and chromium chloride hexahydrate ( $\text{CrCl}_3 \cdot 6\text{H}_2\text{O}$ )), organic dyes (Rhodamine B (RhB), methyl orange (MO), methyl violet (MV), orange G (OG), methylene blue (MB)), p-chlorophenol (4-CP), sulfamethoxazole (SMX), ciprofloxacin (CIP), tetracycline hydrochloride (TC), Ibuprofen (IBP) and humic acid (HA) were purchased from Aladdin Reagent Co. Ltd. Methanol (MeOH), hydrochloric acid (HCl, 36-38 %), dimethylsulfoxide (DMSO) were purchased from Chengdu Kelong Chemical Reagent Co. Ltd. All the chemicals were analytical grade and used as received.

### Fabrication of TMS/carbon nanocomposites via seaweed-mimetic reactor

Zeta potential measurement was carried out with a Zetasizer Nano-ZS90 (Malvern Instruments Ltd., UK). The  $\kappa$ -carrageenan before and after addition of Co (II) were freeze-dried and ground to powders. Then the powders were dispersed to prepare a 1 mg/mL suspension in DI water and the pH value was adjusted (pH 6). The zeta potential measurements were carried out at 25 °C. In order to investigate the effects of different transition metals (TM) on the catalytic performance of catalysts, additional transition metal salts ( $\text{CoCl}_2$ ,  $\text{FeCl}_2$ ,  $\text{NiCl}_2$ ,  $\text{MnCl}_2$  and  $\text{CrCl}_3$ ) were used and pyrolyzed at 900 °C. In order to investigate the effects of Co (II)/SMR ratio on the catalytic performance of catalysts, samples were prepared by varying the initial weight ratio of Co(II)-to- $\kappa$ -carrageen in the Co@SMR, and pyrolyzed at 900 °C (denoted as C-Co@SMR-900-R, where R represents the weight ratio of Co(II)-to- $\kappa$ -carrageen). Detailed synthetic parameters/conditions were all compiled in Table S1 below. Additionally, C-SMR-900 was synthesized by following the same procedure as above but without metal assisted.

**Table S1.** Samples obtained from different synthetic conditions.

| Sample            | Pyrolysis Temperature (°C) | n of TM (mM) | m (TM):<br>m (carrageen) <sup>a</sup> |
|-------------------|----------------------------|--------------|---------------------------------------|
| C-Co@SMR-800      | 800                        | 100          | 1.125:1                               |
| C-Co@SMR-900      | 900                        | 100          | 1.125:1                               |
| C-Co@SMR-1000     | 1000                       | 100          | 1.125:1                               |
| C-Fe@SMR-900      | 900                        | 100          | 0.831:1                               |
| C-Ni@SMR-900      | 900                        | 100          | 0.994:1                               |
| C-Mn@SMR-900      | 900                        | 100          | 0.526:1                               |
| C-Cr@SMR-900      | 900                        | 100          | 1.114:1                               |
| C-Co@SMR-900-R0.1 | 900                        | 10           | 0.113:1                               |
| C-Co@SMR-900-R0.3 | 900                        | 33           | 0.375:1                               |
| C-SMR-900         | 900                        | 0            | 0                                     |

<sup>a</sup> Initial weight ratios of reagents used to synthesize the materials.

### Preparation of Co<sub>9</sub>S<sub>8</sub> nanoparticles (NPs)

A control sample comprising only Co<sub>9</sub>S<sub>8</sub> NPs was also synthesized using the following hydrothermal synthetic procedure.<sup>1</sup> First, cobalt (II) acetate tetrahydrate (Co(Ac)<sub>2</sub>·4H<sub>2</sub>O, 5 mmol) and thiourea ((NH<sub>2</sub>)<sub>2</sub>CS, 5 mmol) were dissolved in ethylene glycol (30 mL). The resulting solution was then transferred into a Teflon-lined stainless-steel autoclave (40 mL) and kept in an oven at 200 °C for 8 h. The mixture was let to cool down to room temperature and then centrifuged. The resulting black-colored solid powdered product was rinsed with ethanol and let dry at 60 °C.

### Preparation of C-Co@SMR-900E

To thoroughly remove the Co<sub>9</sub>S<sub>8</sub> nanocrystals in the C-Co@SMR-900, 50 mg of C-Co@SMR-900 were put in 5 M HCl solution at 80 °C for 4 days, followed by washing with deionized water and then drying at 60 °C for 6 h. The obtained sample was named

as C-Co@SMR-900E.

### **Preparation of C-Co@SMR-900/PVDF composite microfiltration membrane**

The C-Co@SMR-900/PVDF composite microfiltration membrane was prepared by directly filtering 10 mg of C-Co@SMR-900 suspensions on a PVDF substrate (Jinteng, 0.22  $\mu\text{m}$ ) to obtain a loading amount of 0.18  $\text{mg}/\text{cm}^2$ .

### **Calculation of turnover frequencies (TOF) and apparent rate constant (k)**

The turnover frequencies (TOF) per metallic atom basis for pollutant removal was calculated through dividing the reaction rate of pollutant degradation by the catalyst concentration.<sup>2</sup>

The apparent rate constant (k) was evaluated by a pseudo first-order kinetics model (eq S1):

$$-\ln(C_t/C_0) = kt \quad (1)$$

where  $C_0$  is the initial pollutant concentration,  $C_t$  is the concentration at a certain time  $t$  during the degradation process.

The pollutant removal efficiency was calculated using eq S2:

$$\text{Removal efficiency (\%)} = 100 \times (C_0 - C_t)/C_0 \quad (2)$$

where  $C_0$  is the initial pollutant concentration,  $C_t$  is the concentration at a certain time  $t$  during the degradation process.

### **Electro-chemical measurement**

Tafel diagrams were recorded on an electrochemical workstation (CHI 660E, Chenhua Instrument, China) employing a three-electrode system of platinum electrode as the counter, and saturated calomel electrode as the reference electrode. The electrolyte used in this study was 50 mM  $\text{Na}_2\text{SO}_4$  aqueous solution. All the Tafel diagrams were obtained by polarizing the work electrodes  $\pm 200$  mV with respect to their open circuit potentials. All the potentials in the Tafel diagrams were with respect to the standard hydrogen electrode (SHE). Electrochemical impedance spectroscopy

(EIS) measurements were conducted on an AUTOLAB electrochemical workstation in the frequency range of 100 kHz - 10 mHz with an amplitude of 5 mV.

### **Recyclability and regeneration of C-Co@SMR-900**

In each cycle, 1 mg RhB and 10 mg PMS were continuous added to the reaction system. In the recycle test, C-Co@SMR-900 was separated by centrifugation, washed with ethanol (twice) and water (twice), dried in a vacuum oven (60 °C) overnight, and collected for further tests.

## Results

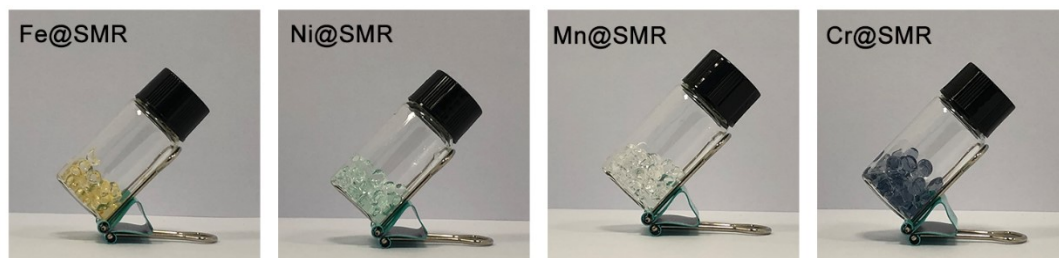

**Fig. S1** Photographs of Fe@SMR, Ni@SMR, Mn@SMR and Cr@SMR.

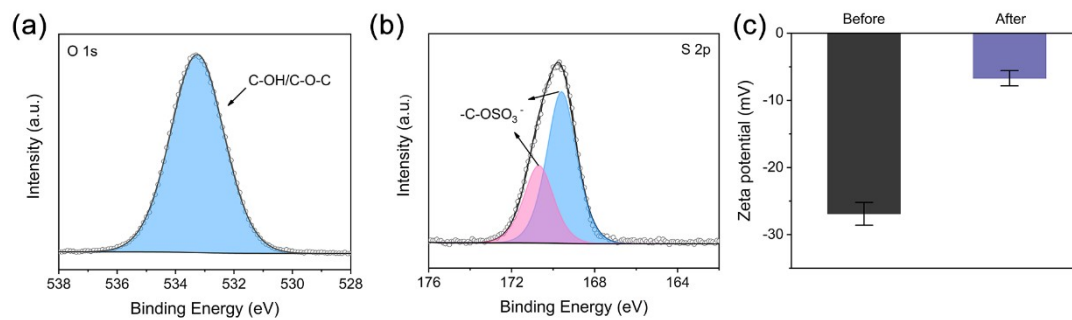

**Fig. S2** High resolution O 1s (a) and S 2p (b) XPS spectra of Co@SMR. (c) The zeta potential of the  $\kappa$ -carrageenan in the SMR before and after adding Co (II).

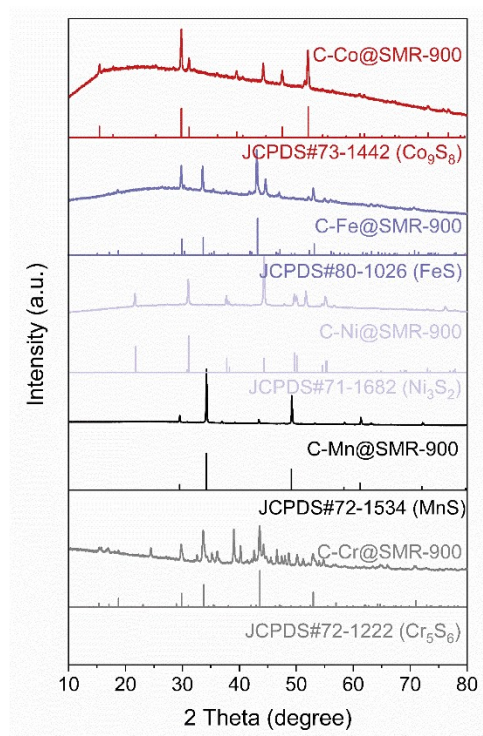

**Fig. S3** XRD patterns of the C-Co@SMR-900, C-Fe@SMR-900, C-Ni@SMR-900, C-Mn@SMR-900 and C-Cr@SMR-900.



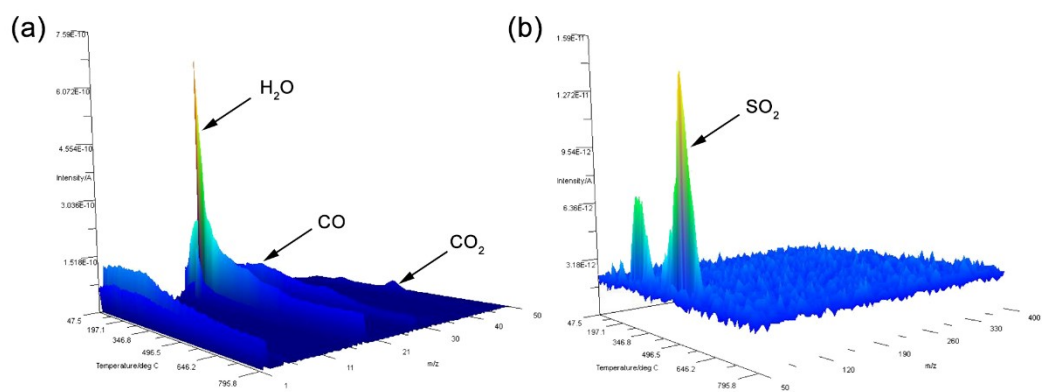

**Fig. S4** 3D-MS curves of the outlet gases during the *in-situ* sulfidation process.

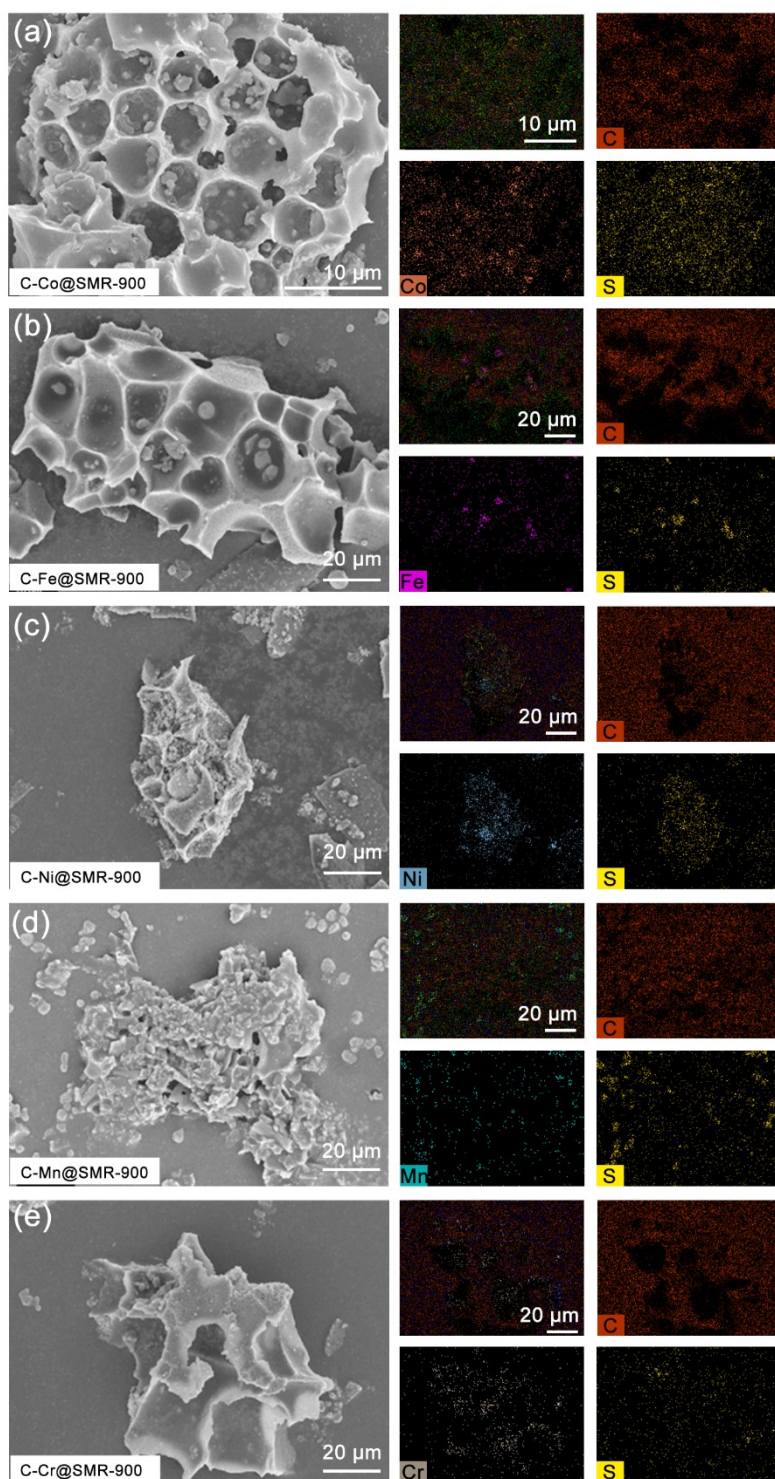

**Fig. S5** FESEM image and the corresponding EDS mapping of (a) C-Co@SMR-900, (b) C-Fe@SMR-900, (c) C-Ni@SMR-900, (d) C-Mn@SMR-900 and (e) C-Cr@SMR-900.

**Table S2.** Surface elemental compositions of C-Co@SMR-900 obtained by EDS.

|              | C (at. %) | O (at. %) | S (at. %) | Co (at. %) |
|--------------|-----------|-----------|-----------|------------|
| C-Co@SMR-900 | 82.71     | 11.65     | 3.01      | 2.56       |

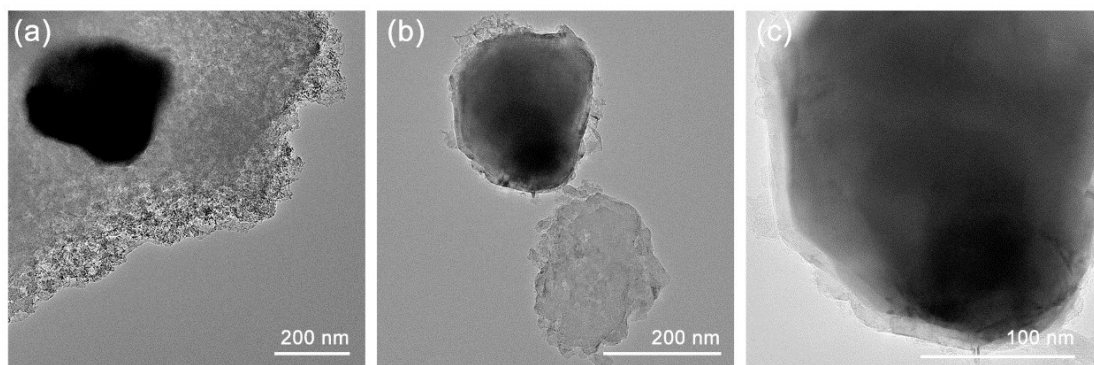

**Fig. S6** TEM images of C-Co@SMR-900

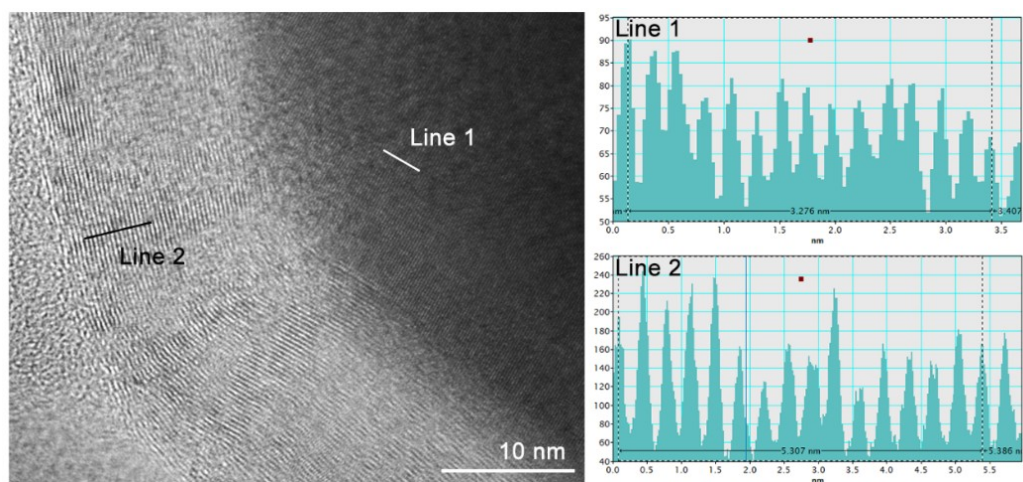

**Fig. S7** Intensity profiles obtained in the  $\text{Co}_9\text{S}_8$  nanocrystals (Line 1) and graphitic layer (Line 2).

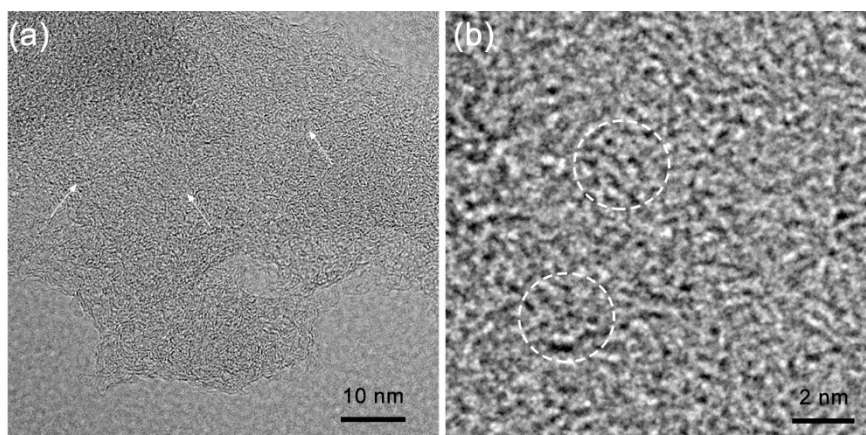

**Fig. S8** HRTEM images of amorphous carbon layers with (a) micropores (b) defects in the C-Co@SMR-900.

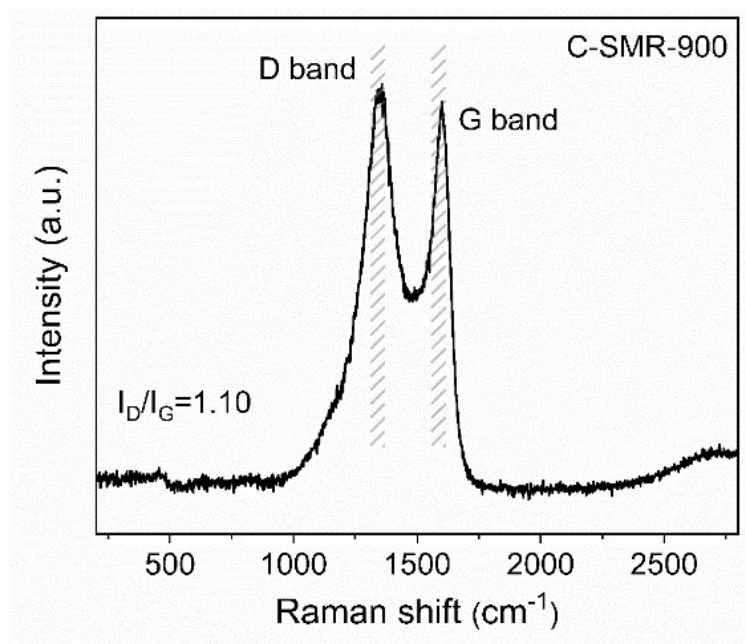

**Fig. S9** Raman spectra of the C-SMR-900.

**Table S3.** Surface areas and pore volume distributions of the as-synthesized catalysts

| Sample        | BET surface area<br>(m <sup>2</sup> g <sup>-1</sup> ) | Total pore volume<br>(cm <sup>3</sup> g <sup>-1</sup> ) | Micropore volumes <sup>[a]</sup><br>(cm <sup>3</sup> g <sup>-1</sup> ) | Meso-<br>macropore<br>volume <sup>[b]</sup><br>(cm <sup>3</sup> g <sup>-1</sup> ) |
|---------------|-------------------------------------------------------|---------------------------------------------------------|------------------------------------------------------------------------|-----------------------------------------------------------------------------------|
| C-Co@SMR-800  | 338.385                                               | 0.195                                                   | 0.108                                                                  | 0.078                                                                             |
| C-Co@SMR-900  | 467.293                                               | 0.262                                                   | 0.121                                                                  | 0.113                                                                             |
| C-Co@SMR-1000 | 576.615                                               | 0.414                                                   | 0.166                                                                  | 0.221                                                                             |

<sup>[a]</sup> Calculated using t-plot (FHH) method.

<sup>[b]</sup> Calculated by subtracting the total pore volume with the micropore volumes.



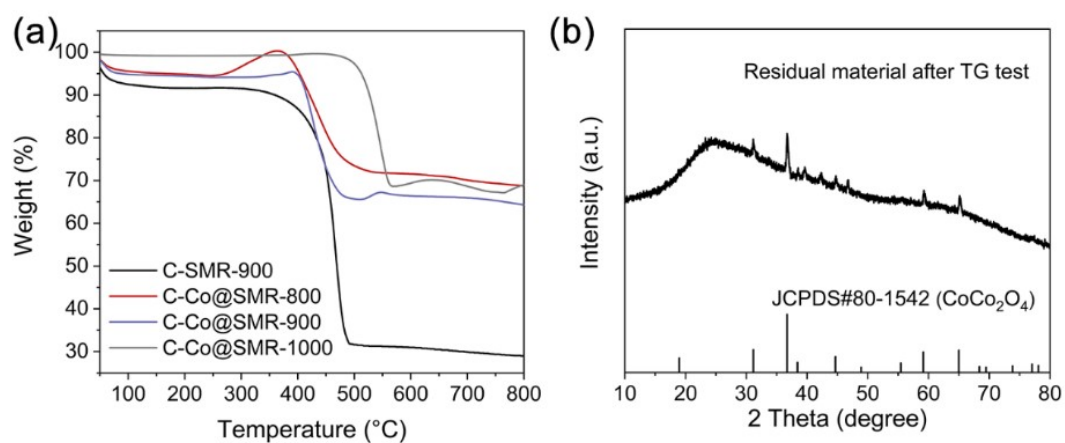

**Fig. S10** (a) Thermogravimetric (TG) traces in air in the temperature range of 50 °C to 800 °C for C-SMR-900, C-Co@SMR-800, C-Co@SMR-900 and C-Co@SMR-1000. (b) XRD patterns of the residual material after TG test of C-Co@SMR-900.

**Table S4.** Cobalt loadings of various catalysts obtained by TG and ICP-OES.

| Samples       | Cobalt loadings (wt.%) |       |
|---------------|------------------------|-------|
|               | TG                     | ICP   |
| C-Co@SMR-800  | 29.18                  | 29.40 |
| C-Co@SMR-900  | 25.95                  | 26.22 |
| C-Co@SMR-1000 | 28.03                  | 29.05 |

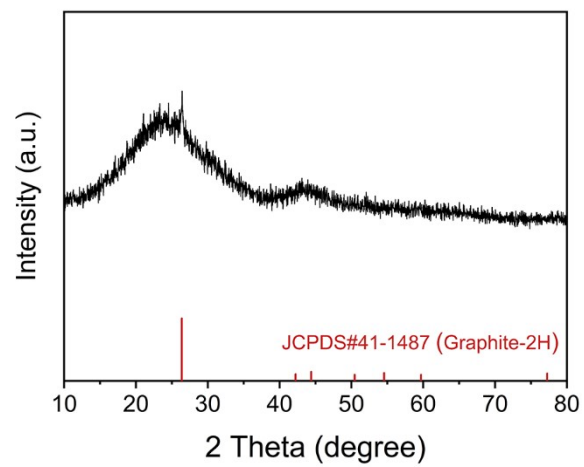

**Fig. S11** XRD pattern of C-Co@SMR-900E

**Table S5.** Surface elemental compositions obtained by XPS.

| Samples       | C     |       | O     |       | S     |       | Co    |       |
|---------------|-------|-------|-------|-------|-------|-------|-------|-------|
|               | at. % | wt. % |
| C-Co@SMR-800  | 80.40 | 68.26 | 15.42 | 17.44 | 2.54  | 10.57 | 1.65  | 3.73  |
| C-Co@SMR-900  | 89.27 | 79.97 | 6.89  | 8.22  | 1.31  | 5.75  | 2.53  | 6.06  |
| C-Co@SMR-1000 | 93.06 | 86.90 | 4.49  | 5.58  | 0.67  | 3.07  | 1.78  | 4.45  |
| C-Co@SMR-900E | 88.58 | 83.20 | 9.65  | 12.10 | 1.64  | 4.11  | 0.13  | 0.61  |

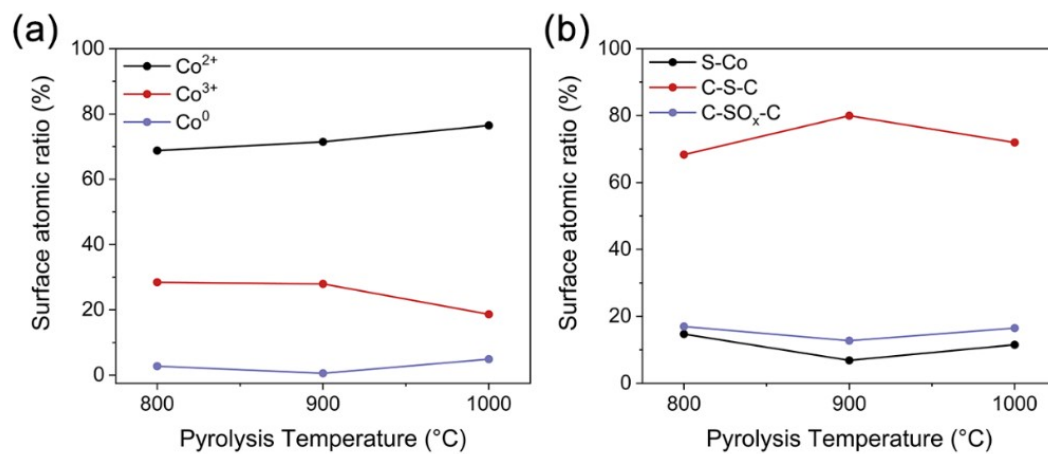

**Fig. S12** Percentages of different (a) Co and (b) S species present in C-Co@SMR-900.

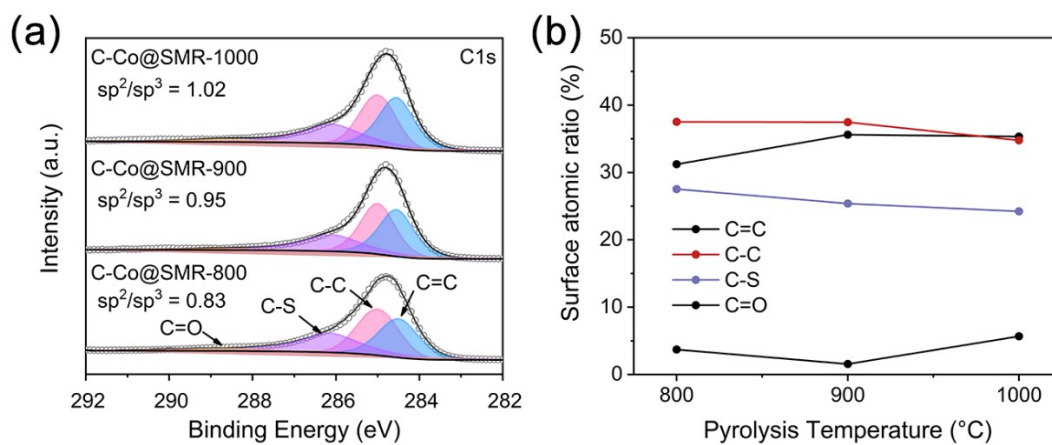

**Fig. S13** High-resolution C 1s spectra of C-Co@SMR-800, C-Co@SMR-900 and C-Co@SMR-1000. (b) Changes of different C species in different pyrolysis temperature.

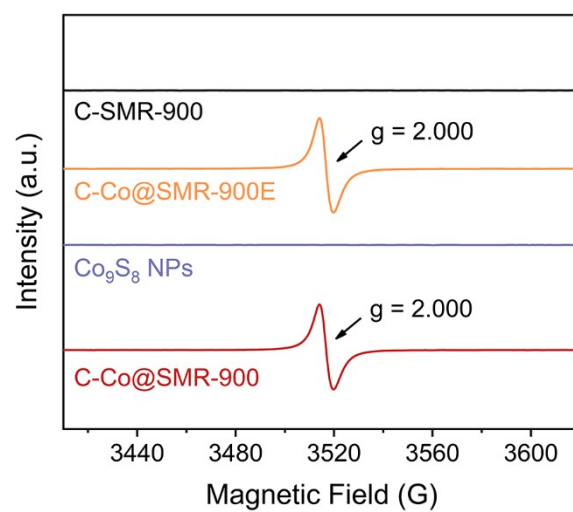

**Fig. S14** EPR spectra of C-SMR-900, C-Co@SMR-900E, Co<sub>9</sub>S<sub>8</sub> NPs and C-Co@SMR-900.

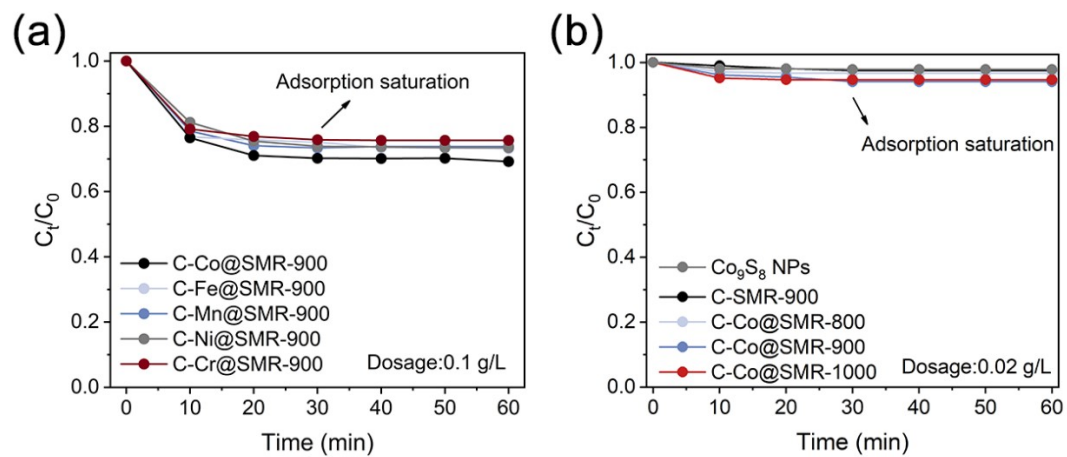

**Fig. S15** Time-dependent adsorption curves for RhB by different dosages of catalysts.

(a) 0.1 g/L. (b) 0.02 g/L. [RhB]<sub>0</sub> = 20 mg/L, initial pH = 6.0, T = 298 K.



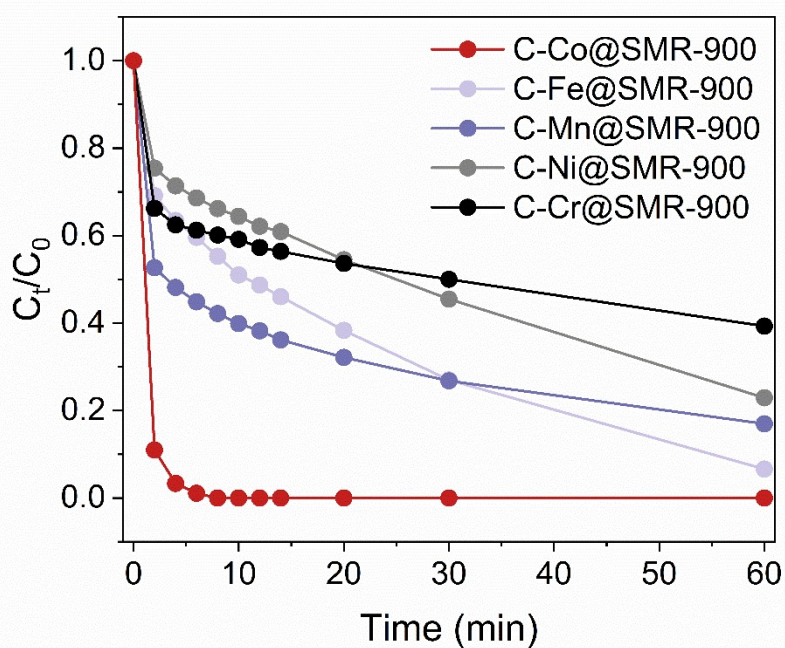

**Fig. S16** The degradation curves of RhB catalyzed by C-Co@SMR-900, C-Fe@SMR-900, C-Mn@SMR-900, C-Ni@SMR-900 and C-Cr@SMR-900. Experimental conditions:  $[\text{RhB}]_0 = 20 \text{ mg/L}$ ,  $[\text{PMS}]_0 = 0.2 \text{ g/L}$ ,  $[\text{C-Co@SMR-900}] = [\text{C-Fe@SMR-900}] = [\text{C-Mn@SMR-900}] = [\text{C-Ni@SMR-900}] = [\text{C-Cr@SMR-900}] = 0.1 \text{ g/L}$ , initial  $\text{pH} = 6.0$ ,  $T = 298 \text{ K}$ .

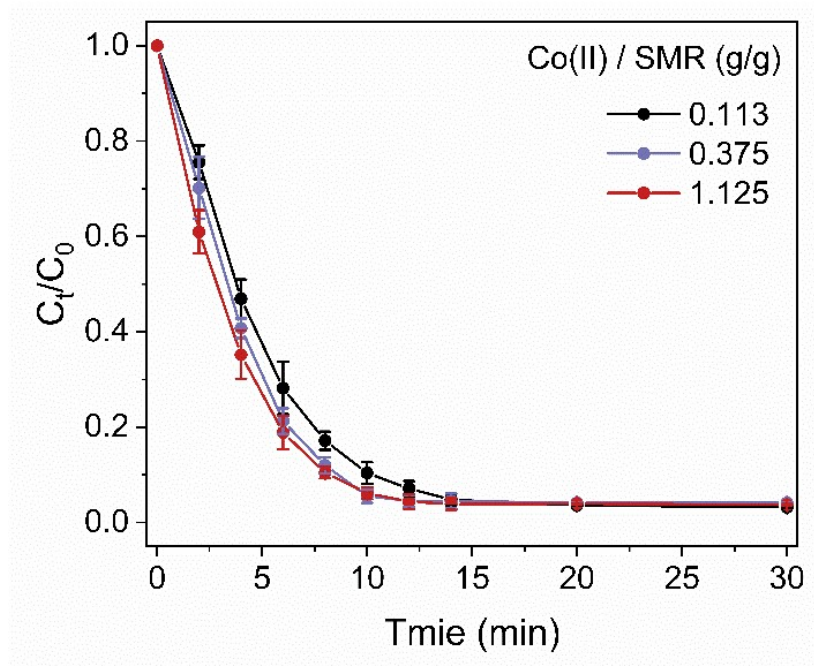

**Fig. S17** The degradation curves of RhB catalyzed by C-Co@SMR-900-R0.1, C-Co@SMR-900-R0.3 and C-Co@SMR-900. Experimental conditions: [RhB]<sub>0</sub> = 20 mg/L, [PMS]<sub>0</sub> = 0.2 g/L, [Catalyst] = 0.02 g/L, initial pH = 6.0, T = 298 K.

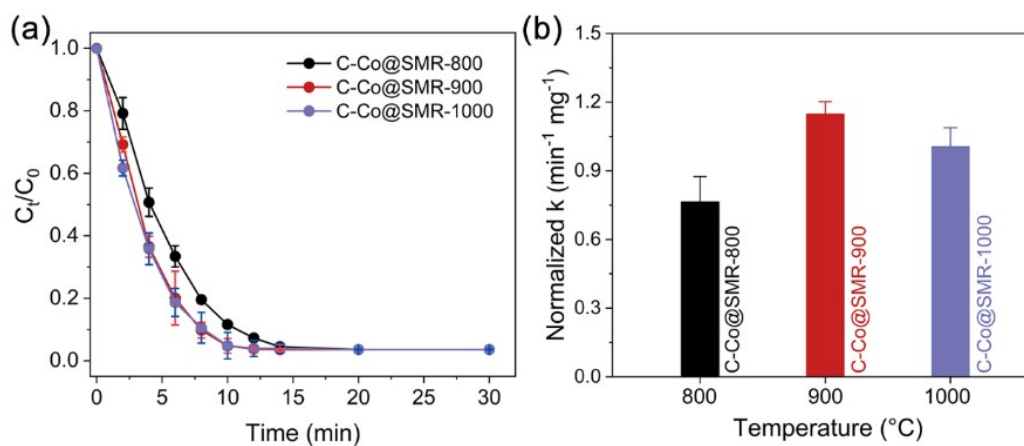

**Fig. S18** (a) The degradation curves of RhB catalyzed by C-Co@SMR-800, C-Co@SMR-900 and C-Co@SMR-1000. (b) Normalized k value by weight of Co. Experimental conditions:  $[\text{RhB}]_0 = 20 \text{ mg/L}$ ,  $[\text{PMS}]_0 = 0.2 \text{ g/L}$ ,  $[\text{Catalyst}] = 0.02 \text{ g/L}$ , initial pH = 6.0, T = 298 K.

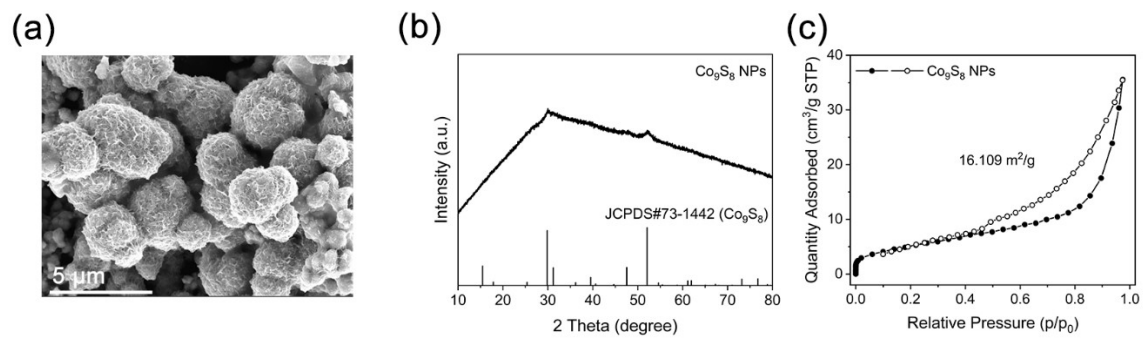

**Fig. S19** Different characterization results for Co<sub>9</sub>S<sub>8</sub> NPs synthesized by hydrothermal method. (a) FESEM image. (b) XRD pattern. (c) N<sub>2</sub> adsorption/desorption isotherms

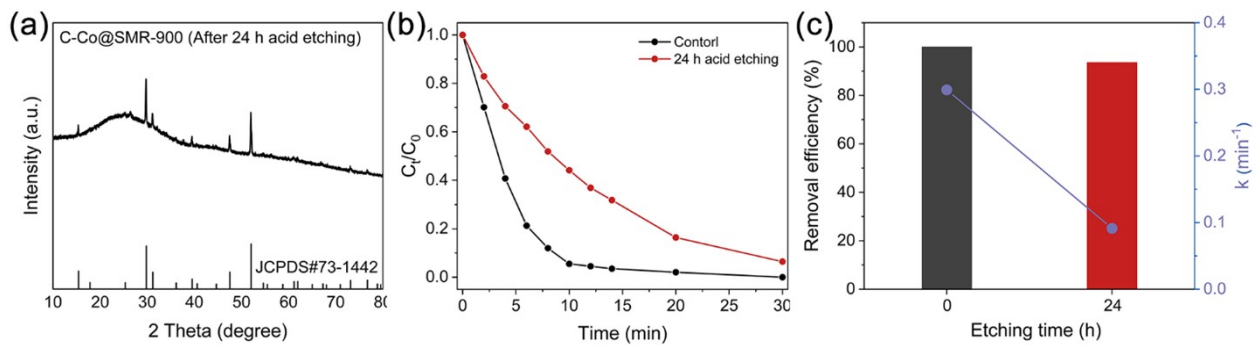

**Fig. S20** (a) XRD pattern of C-Co@SMR-900 after 24 h acid etching. (b) The degradation curves of RhB catalyzed by acid etched C-Co@SMR-900. (c) The removal efficiency of RhB and the corresponding  $k$  value catalyzed by acid etched C-Co@SMR-900 in 30 min.

**Table S6.** The ICP results for cobalt leaching experiments.

| Samples                            | Cobalt leaching (mg/L) |
|------------------------------------|------------------------|
| Co <sub>9</sub> S <sub>8</sub> NPs | 1.92                   |
| C-Co@SMR-800                       | 1.18                   |
| C-Co@SMR-900                       | 0.86                   |
| C-Co@SMR-1000                      | 0.85                   |
| European Union Standard            | 2.0                    |
| Chinese National Standard          | 1.0                    |

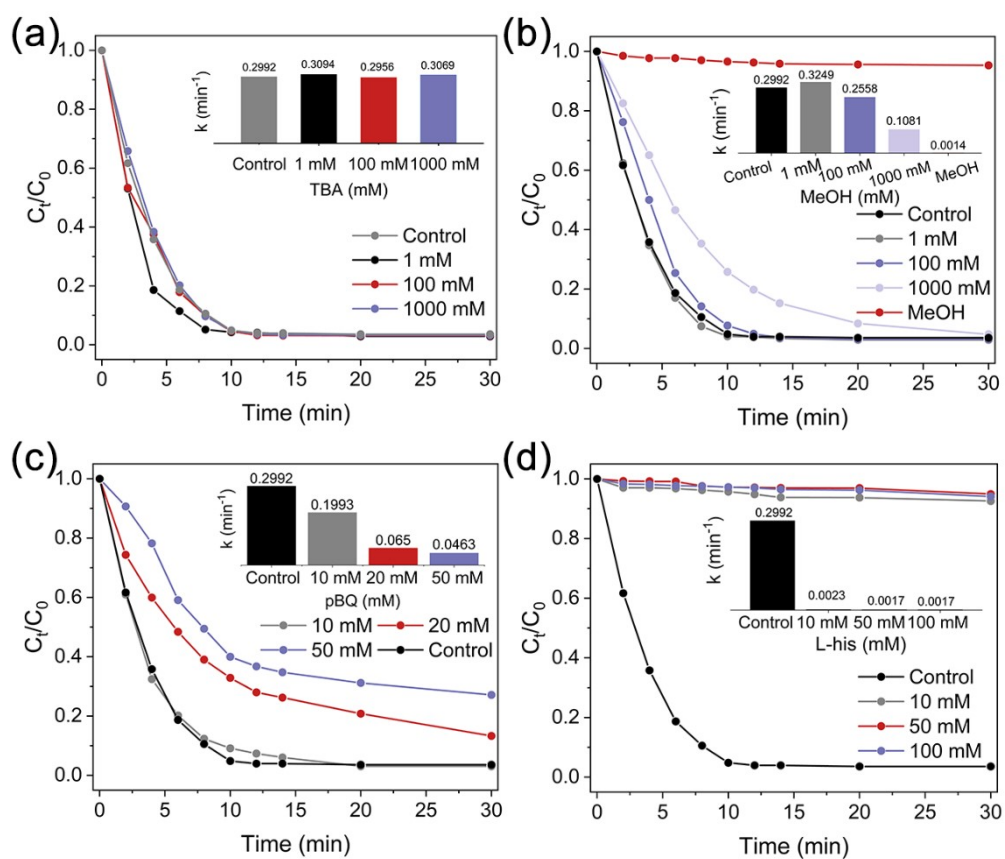

**Fig. S21** Effects of different radical scavengers on the RhB degradation. (a) TBA, (b) MeOH, (c) pBQ, (d) L-his. Experimental conditions:  $[\text{RhB}]_0 = 20 \text{ mg/L}$ ,  $[\text{PMS}]_0 = 0.2 \text{ g/L}$ ,  $[\text{Catalyst}] = 0.02 \text{ g/L}$ , initial pH = 6.0,  $T = 298 \text{ K}$ .

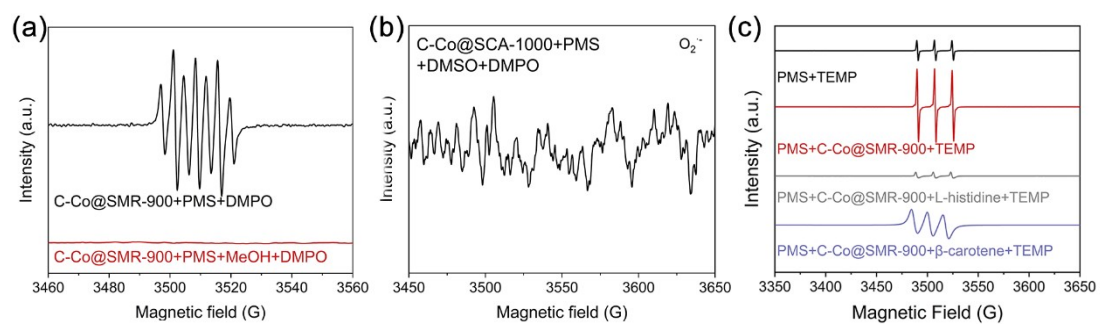

**Fig. S22** (a) EPR spectra in C-Co@SMR-900/PMS and C-Co@SMR-900/PMS/MeOH system with DMPO as the trapping agent. (b) Detection of  $O_2^{\cdot -}$  in C-Co@SMR-900/PMS/DMSO system with DMPO as the trapping agent.



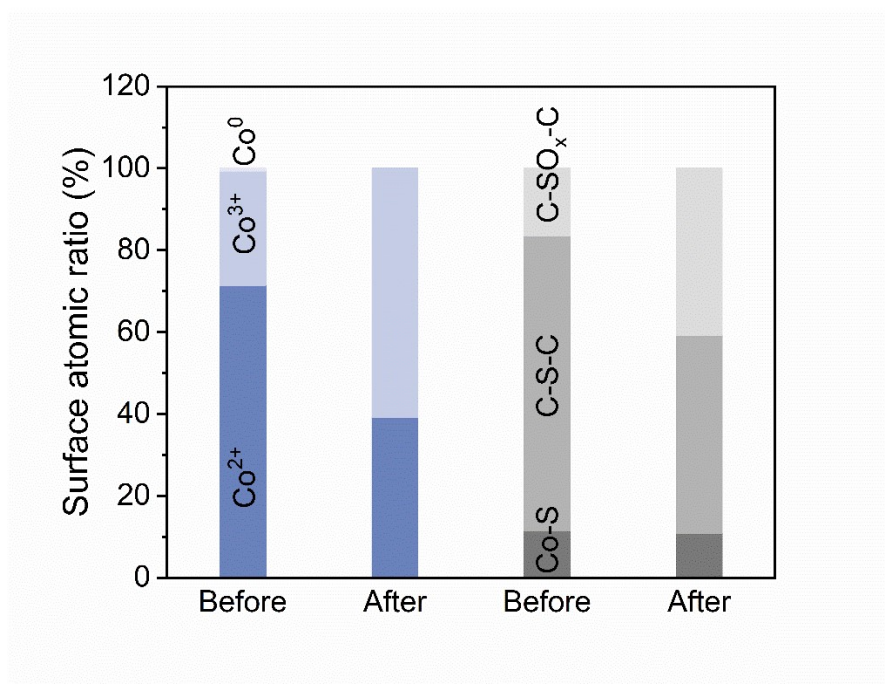

**Fig. S23** Corresponding atomic contents of Co and S before and after reaction.

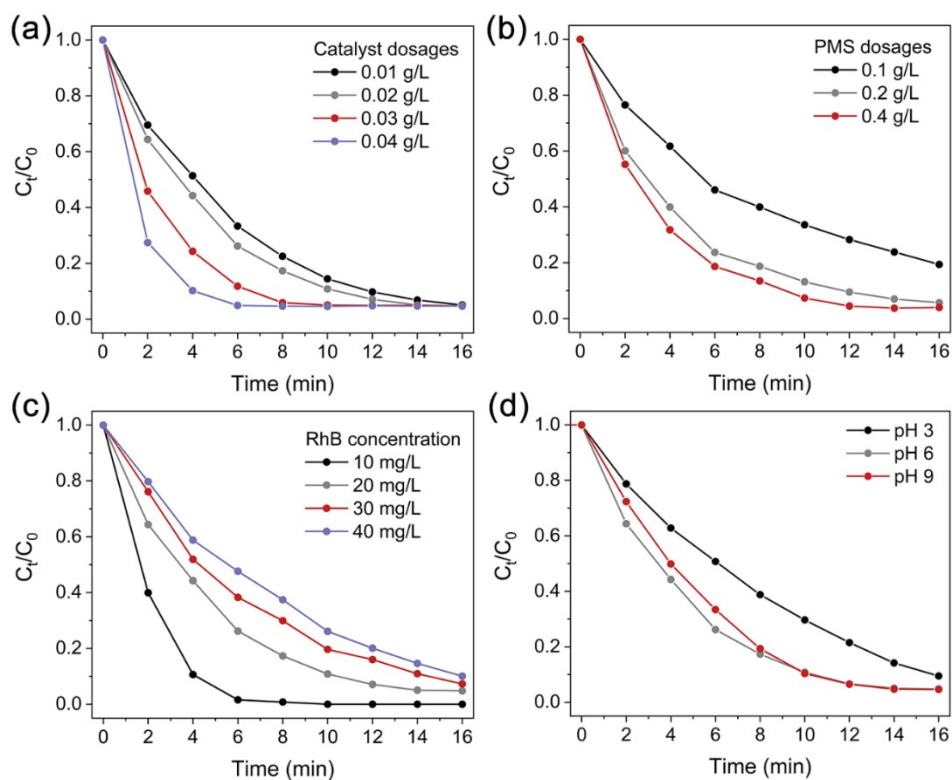

**Fig. S24** RhB degradation in C-Co@SMR-900/PMS system considering (a) catalyst dosage; (b) PMS dosage; (c) RhB concentration; (d) pH conditions. Experimental conditions:  $[RhB]_0 = 20 \text{ mg/L}$ ,  $[PMS]_0 = 0.2 \text{ g/L}$ ,  $[Catalyst] = 0.02 \text{ g/L}$ , initial pH = 6.0,  $T = 298 \text{ K}$ .

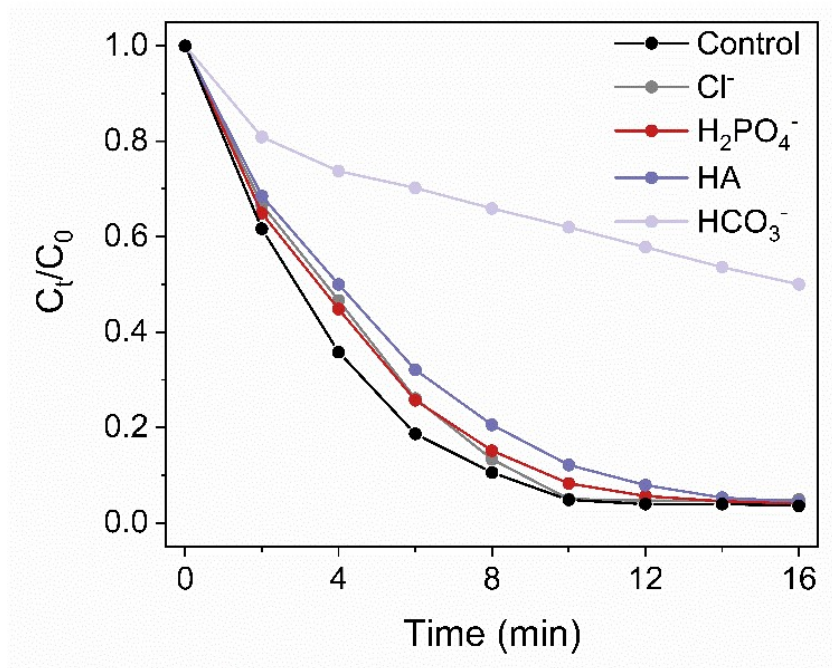

**Fig. S25** Effects of inorganic anions and humic acid (HA) on RhB removal. Experimental conditions:  $[\text{RhB}]_0 = 20 \text{ mg/L}$ ,  $[\text{PMS}]_0 = 0.2 \text{ g/L}$ ,  $[\text{Catalyst}] = 0.02 \text{ g/L}$ ,  $[\text{Cl}^-] = [\text{H}_2\text{PO}_4^-] = [\text{HCO}_3^-] = 5 \text{ mM}$  (if needed),  $[\text{HA}] = 5 \text{ mg/L}$  (if needed), initial pH = 6.0,  $T = 298 \text{ K}$ .

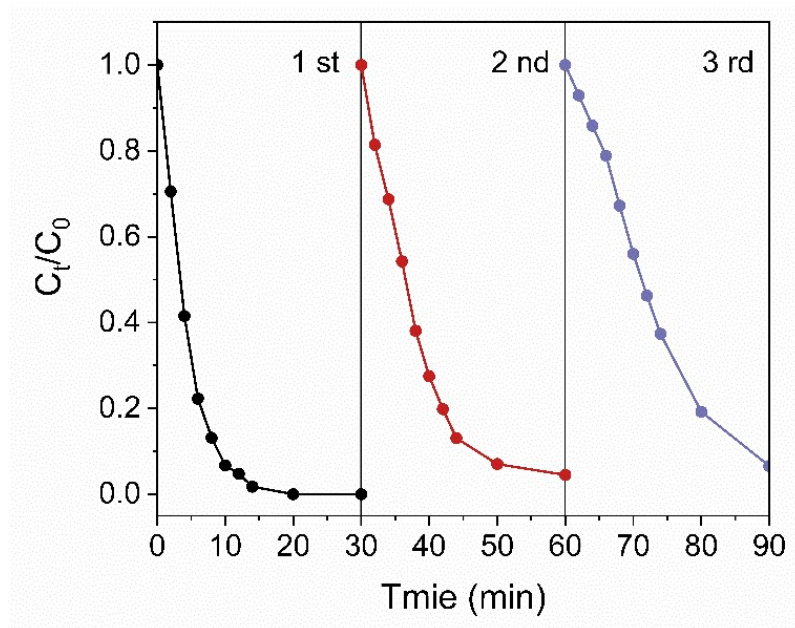

**Fig. S26** Recyclability of C-Co@SMR-900 for RhB removal. Experimental conditions:  $[\text{RhB}]_0 = 20 \text{ mg/L}$ ,  $[\text{PMS}]_0 = 0.2 \text{ g/L}$ ,  $[\text{Catalyst}] = 0.02 \text{ g/L}$ , initial pH = 6.0,  $T = 298 \text{ K}$

**Table S7.** UV-vis analysis conditions.

| Compounds | Structure                                                                           | Maximum absorption wavelength<br>(nm) |
|-----------|-------------------------------------------------------------------------------------|---------------------------------------|
| RhB       | 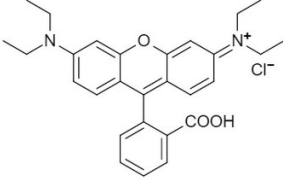   | 554                                   |
| MO        |    | 464                                   |
| MV        |    | 584                                   |
| OG        |  | 478                                   |
| MB        |  | 664                                   |

**Table S8.** HPLC analysis conditions.

| Compounds | Structure                                                                           | Mobile phase                                                                | Flow rate<br>(mL/min) | Absorption<br>(nm) | Retention<br>time<br>(min) |
|-----------|-------------------------------------------------------------------------------------|-----------------------------------------------------------------------------|-----------------------|--------------------|----------------------------|
| 4-CP      |    | DI<br>water/Methanol,<br>(30/70, v/v)                                       | 1                     | 225                | 6.27                       |
| CIP       |    | DI<br>water/Acetonitrile<br>containing 0.1%<br>formic acid,<br>(78/22, v/v) | 1                     | 280                | 2.74                       |
| SMX       |   | Acetonitrile/<br>Phosphate buffer<br>(0.01M, pH 3),<br>(54/46, v/v)         | 1                     | 264                | 4.68                       |
| IBP       |  | Phosphate buffer<br>(0.01M, pH 3),<br>(60/40, v/v)                          | 1                     | 220                | 8.94                       |
| TC        |  | Acetonitrile/<br>Phosphate buffer<br>(0.01M, pH 3),<br>(82/18, v/v)         | 1                     | 360                | 2.43                       |

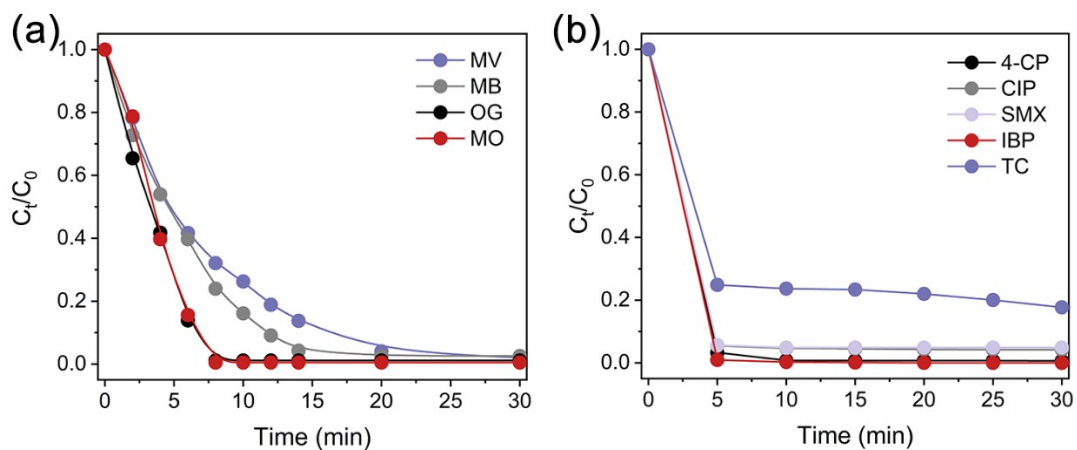

**Fig. S27** The degradation curves of (a) dyes and (b) phenol and pharmaceuticals catalyzed by C-Co@SMR-900,  $[\text{pollutants}]_0 = 20 \text{ mg/L}$ ,  $[\text{PMS}]_0 = 0.2 \text{ g/L}$ ,  $[\text{C-Co@SMR-900}] = 0.02 \text{ g/L}$ , initial pH = 6.0,  $T = 298 \text{ K}$ .

**Table S9.** The catalytic performance comparison of recently reported Fenton-like catalysts for RhB degradation. The turnover frequency (TOF) was calculated through dividing the reaction rate of pollutant degradation by the catalyst concentration.

| Catalyst dosage<br>(g L <sup>-1</sup> )                 | PMS <sup>a</sup> /H <sub>2</sub> O <sub>2</sub> <sup>b</sup><br>dosage (g L <sup>-1</sup> ) | Pollutant<br>(mg L <sup>-1</sup> ) | Reaction time<br>(min) | Removal<br>efficiency (%) | Turnover<br>frequencies<br>(min <sup>-1</sup> ) | Ref. |
|---------------------------------------------------------|---------------------------------------------------------------------------------------------|------------------------------------|------------------------|---------------------------|-------------------------------------------------|------|
| C1B2O-5 (0.8)                                           | 0.2 <sup>a</sup>                                                                            | RhB (25)                           | 180                    | 63.6                      | 0.005                                           | 3    |
| ASMn-Nb (0.2)                                           | 0.5 <sup>a</sup>                                                                            | RhB (20)                           | 60                     | 99.7                      | 0.43                                            | 4    |
| MnO <sub>2</sub> /Fe <sub>2</sub> O <sub>3</sub> (0.06) | 0.25 <sup>a</sup>                                                                           | RhB (10)                           | 20                     | 100                       | 3.85                                            | 5    |
| 5% Ca-Fe <sub>2</sub> O <sub>3</sub> (0.5)              | 0.2 <sup>a</sup>                                                                            | RhB (10)                           | 120                    | 99                        | 0.0736                                          | 6    |
| CA (0.2)                                                | 0.3 <sup>a</sup>                                                                            | RhB (20)                           | 100                    | 90                        | 0.351                                           | 7    |
| Fe-Co-Co PBA@PmPDs<br>(0.1)                             | 0.4 <sup>a</sup>                                                                            | RhB (15)                           | 60                     | 90.3                      | 0.42                                            | 8    |
| CoFe <sub>2</sub> O <sub>4</sub> /TNTs (0.2)            | 4 <sup>a</sup>                                                                              | RhB (100)                          | 30                     | 100                       | 0.3365                                          | 9    |
| A-Boron (0.2)                                           | 0.15 <sup>a</sup>                                                                           | RhB (10)                           | 60                     | 90                        | 0.178                                           | 10   |
| Cal-ZIF-67/AC(0.12)                                     | 0.35 <sup>a</sup>                                                                           | RhB (60)                           | 60                     | 98                        | 0.4892                                          | 11   |
| NH <sub>3</sub> -S600-KOH (0.2)                         | 0.25 <sup>a</sup>                                                                           | RhB (20)                           | 40                     | 100                       | 0.497                                           | 12   |
| AgBiO <sub>3</sub> /GO/NCDS-2<br>(0.5)                  | 0.6 <sup>a</sup>                                                                            | RhB (10)                           | 10                     | 95.35                     | 0.1104                                          | 13   |
| Co(II) doped TiO <sub>2</sub> (0.5)                     | 0.3 <sup>a</sup>                                                                            | RhB (50)                           | 40                     | 99                        | 0.496                                           | 14   |
| 1% Co-g-C <sub>3</sub> N <sub>4</sub> (0.4)             | 0.04 <sup>a</sup>                                                                           | RhB (10)                           | 25                     | 99                        | 0.3308                                          | 15   |
| BFO-30 (0.2)                                            | 0.4 <sup>a</sup>                                                                            | RhB (10)                           | 50                     | 99                        | 0.495                                           | 16   |
| 30%-CNTs-Fe-Mn-0.5<br>(0.1)                             | 0.4 <sup>a</sup>                                                                            | RhB (15)                           | 60                     | 95                        | 0.42                                            | 17   |
| g-C <sub>3</sub> N <sub>4</sub> /MgO (0.2)              | 1.02 <sup>b</sup>                                                                           | RhB (10)                           | 420                    | 91                        | 2.1145                                          | 18   |



|                                                              |                    |            |     |      |        |           |
|--------------------------------------------------------------|--------------------|------------|-----|------|--------|-----------|
| MnFeO <sub>2</sub> @OA/PS Janus particles (0.15)             | 2 <sup>b</sup>     | RhB (10)   | 600 | 95   | 0.0198 | 19        |
| Co-HAP-2 (0.2)                                               | 0.014 <sup>b</sup> | RhB (40)   | 12  | 93.3 | 0.166  | 20        |
| I-FeN <sub>x</sub> /g-C <sub>3</sub> N <sub>4</sub> -5 (0.5) | 2.62 <sup>b</sup>  | RhB(200)   | 8   | 100  | 1.093  | 21        |
| Cu-C <sub>3</sub> N <sub>4</sub> (1)                         | 1 <sup>b</sup>     | RhB (4.79) | 5   | 100  | 1.64   | 22        |
| P-PFeCo (2)                                                  | 0.1                | RhB(20)    | 8   | 100  | 0.4    | 23        |
| C-Co@SMR-900 (0.02)                                          | 0.2 <sup>a</sup>   | RhB (10)   | 14  | 100  | 34.525 | This work |
| C-Co@SMR-900 (0.02)                                          | 0.1 <sup>a</sup>   | RhB (20)   | 14  | 83   | 4.94   | This work |
| C-Co@SMR-900 (0.02)                                          | 0.2 <sup>a</sup>   | RhB (20)   | 14  | 100  | 15.05  | This work |

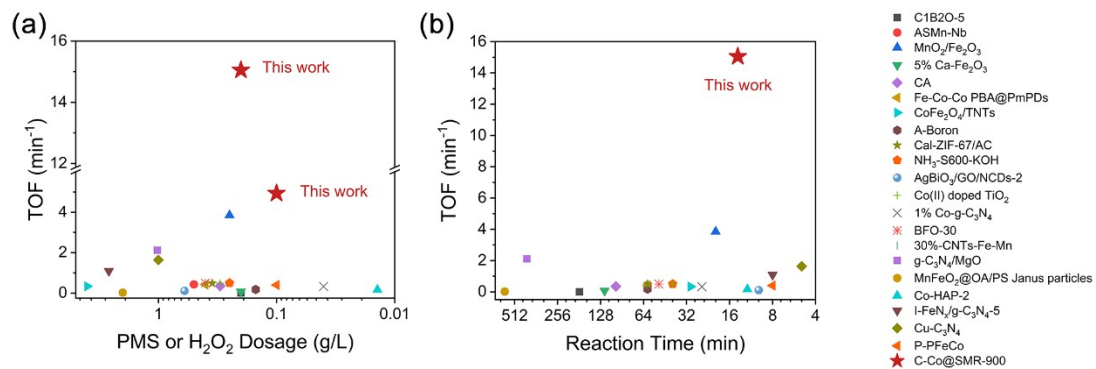

**Fig. S28** Summary of catalytic performances of some recently reported catalysts under different reaction conditions (PMS or H<sub>2</sub>O<sub>2</sub> dosage and reaction time)

**Table S10.** The catalytic performance comparison of recently reported metal sulfide/carbon-based Fenton-like catalysts.

| Catalyst dosage<br>(g L <sup>-1</sup> )                      | PMS <sup>a</sup> /H <sub>2</sub> O <sub>2</sub> <sup>b</sup><br>dosage (g L <sup>-1</sup> ) | Pollutant<br>(mg L <sup>-1</sup> ) | Reaction time<br>(min) | Removal<br>efficiency (%) | Turnover frequencies<br>(min <sup>-1</sup> ) | TOC removal<br>(Reaction time) | Ref.         |
|--------------------------------------------------------------|---------------------------------------------------------------------------------------------|------------------------------------|------------------------|---------------------------|----------------------------------------------|--------------------------------|--------------|
| Mn <sub>0.3</sub> Co <sub>2.7</sub> S <sub>4</sub><br>(0.08) | 0.3 <sup>a</sup>                                                                            | SMT (55)                           | 120                    | 97                        | 4.54                                         | 25%/120 min                    | 24           |
| FeS <sub>2</sub> (2)                                         | 0.6 <sup>a</sup>                                                                            | DEP (20)                           | 120                    | 100                       | 0.064                                        | 50.5%/120 min                  | 25           |
| CoS <sub>2</sub> (0.08)                                      | 0.4 <sup>a</sup>                                                                            | CIP (10)                           | 60                     | 100                       | 1.5                                          | 20.7%/60 min                   | 26           |
| Co <sub>9</sub> S <sub>8</sub> @N-S-BC<br>(0.2)              | 0.5 <sup>a</sup>                                                                            | SMX (20)                           | 240                    | 100                       | 1.73                                         | 33.3%/240 min                  | 27           |
| Co <sub>9</sub> S <sub>8</sub> @NSBOC<br>(0.2)               | 0.2 <sup>a</sup>                                                                            | MB (30)                            | 60                     | 98                        | 0.34                                         | 27.59%/60 min                  | 28           |
| Co/Co <sub>9</sub> S <sub>8</sub> @N-S-<br>O-C (0.1)         | 0.25 <sup>a</sup>                                                                           | SMX (10)                           | 240                    | 100                       | 3.07                                         | 30.1%/240 min                  | 29           |
| CoS@GN-60<br>(0.1)                                           | 0.1 <sup>a</sup>                                                                            | BPA (20)                           | 8                      | 97.1                      | 6.2                                          | 40.64%/8 min                   | 30           |
| C-Co@SMR-900<br>(0.02)                                       | 0.2 <sup>a</sup>                                                                            | RhB (20)                           | 14                     | 100                       | 15.05                                        | 23.55%/30 min                  | This<br>work |
| C-Co@SMR-900<br>(0.08)                                       | 0.2 <sup>a</sup>                                                                            | RhB (20)                           | 14                     | 100                       | 11.06                                        | 75.18%/60 min                  | This<br>work |

**Table S11.** Estimated total cost for preparing 1 g of recently reported Fenton-like catalysts.

| Classification        | Catalysts                                            | Materials                                            | Amount used (g) | Unit cost (dollar) | Total cost (dollar) | Ref. |
|-----------------------|------------------------------------------------------|------------------------------------------------------|-----------------|--------------------|---------------------|------|
| Metallic oxides       | C-CoCu-HNC <sup>a</sup>                              | Co(NO <sub>3</sub> ) <sub>2</sub> ·6H <sub>2</sub> O | 2.448           | 0.098              | 2.258               | 31   |
|                       |                                                      | Cu(NO <sub>3</sub> ) <sub>2</sub> ·3H <sub>2</sub> O | 0.294           | 0.151              |                     |      |
|                       |                                                      | 2-methyl imidazole                                   | 4.189           | 0.106              |                     |      |
|                       |                                                      | methanol                                             | 306 mL          | 0.005              |                     |      |
|                       |                                                      | CoCl <sub>2</sub> ·6H <sub>2</sub> O                 | 0.553           | 0.044              |                     |      |
|                       |                                                      | titanium isopropoxide                                | 2.183           | 0.028              |                     |      |
|                       | Co(II) doped TiO <sub>2</sub> <sup>a</sup>           | glycerol                                             | 28.631 mL       | 0.018              | 1.389               | 14   |
|                       |                                                      | ethylenediamine                                      | 14.315 mL       | 0.055              |                     |      |
|                       | CoFe <sub>2</sub> O <sub>4</sub> /TNTs <sup>c</sup>  | Co(NO <sub>3</sub> ) <sub>2</sub> ·6H <sub>2</sub> O | 0.583           | 0.098              | 0.225               | 9    |
|                       |                                                      | Fe(NO <sub>3</sub> ) <sub>3</sub> ·9H <sub>2</sub> O | 1.614           | 0.013              |                     |      |
| citrate acid          |                                                      | 0.841                                                | 0.008           |                    |                     |      |
| ethanol               |                                                      | N/A                                                  | 0.005           |                    |                     |      |
| TiO <sub>2</sub>      |                                                      | 0.5                                                  | 0.013           |                    |                     |      |
| NaOH                  |                                                      | 6.667                                                | 0.020           |                    |                     |      |
| Co-HAP-2 <sup>b</sup> | hydroxyapatite                                       | 1                                                    | 15.387          | 15.458             | 20                  |      |
|                       | Co(NO <sub>3</sub> ) <sub>2</sub> ·6H <sub>2</sub> O | 0.728                                                | 0.098           |                    |                     |      |
|                       | Co(NO <sub>3</sub> ) <sub>2</sub> ·6H <sub>2</sub> O | 0.16                                                 | 0.098           |                    |                     |      |
|                       | 2-methyl imidazole                                   | 0.391                                                | 0.106           |                    |                     |      |
| Metal/carbon hybrid   | Cal-ZIF-67/AC <sup>b</sup>                           | methanol                                             | 16.5 mL         | 0.005              | 0.155               | 11   |
|                       |                                                      | activated carbon pellets (10–60 mesh)                | 1.2             | 0.013              |                     |      |
|                       | AgBiO <sub>3</sub> /GO/NCDs-2 <sup>b</sup>           | AgNO <sub>3</sub>                                    | 0.349           | 2.031              | 4.413               | 13   |

|               |                                                                     |                                                      |          |         |       |           |
|---------------|---------------------------------------------------------------------|------------------------------------------------------|----------|---------|-------|-----------|
|               |                                                                     | NaBiO <sub>3</sub> ·2H <sub>2</sub> O                | 0.734    | 1.384   |       |           |
|               |                                                                     | graphene oxide                                       | 0.010    | 339.657 |       |           |
|               |                                                                     | citrate acid                                         | 0.005    | 0.008   |       |           |
|               |                                                                     | ethylenediamine                                      | 0.002 mL | 0.055   |       |           |
|               |                                                                     | ethanol                                              | N/A      | 0.005   |       |           |
|               |                                                                     | Fe(NO <sub>3</sub> ) <sub>3</sub> ·9H <sub>2</sub> O | 0.502    | 0.013   |       |           |
|               |                                                                     | 50 wt.% Mn(NO <sub>3</sub> ) <sub>2</sub>            | 0.890    | 0.015   |       |           |
|               |                                                                     |                                                      | 157.35   |         |       |           |
|               | 30%-CNTs-Fe-Mn-0.5 <sup>b</sup>                                     | acetone                                              |          | 0.004   | 1.182 | 17        |
|               |                                                                     |                                                      | mL       |         |       |           |
|               |                                                                     | CNTs                                                 | 0.2      | 2.192   |       |           |
|               |                                                                     | 30 wt.% HNO <sub>3</sub>                             | 31.47 mL | 0.003   |       |           |
|               |                                                                     | κ-Carrageenan                                        | 0.941    | 0.020   |       |           |
|               | C-Co@SMR-900 <sup>b</sup>                                           |                                                      |          |         | 0.065 | This work |
|               |                                                                     | CoCl <sub>2</sub> ·6H <sub>2</sub> O                 | 1.058    | 0.044   |       |           |
|               |                                                                     | FeSO <sub>4</sub> ·7H <sub>2</sub> O                 | 0.272    | 0.009   |       |           |
|               |                                                                     | 2-methyl imidazole                                   | 1.284    | 0.106   |       |           |
|               |                                                                     | polyvinylpyrrolidone                                 | 1.175    | 0.061   |       |           |
| Metal cluster | I-FeN <sub>x</sub> /g-C <sub>3</sub> N <sub>4</sub> -5 <sup>c</sup> |                                                      |          |         | 0.259 | 21        |
|               |                                                                     | methanol                                             | 3.264 mL | 0.005   |       |           |
|               |                                                                     | melamine                                             | 2.055    | 0.016   |       |           |
|               |                                                                     | ethanol                                              | N/A      | 0.005   |       |           |
|               |                                                                     | cyanamide                                            | 2        | 0.050   |       |           |
| Single atom   | Cu-C <sub>3</sub> N <sub>4</sub>                                    |                                                      |          |         | 0.143 | 22        |
|               |                                                                     | Cu(NO <sub>3</sub> ) <sub>2</sub> ·3H <sub>2</sub> O | 0.287    | 0.151   |       |           |
|               |                                                                     | sewage sludge                                        | N/A      | N/A     |       |           |
| Metal-free    | NH <sub>3</sub> -S600-KOH                                           |                                                      |          |         |       |           |
|               |                                                                     | KOH                                                  | 2.805    | 0.012   | 4.033 | 12        |
|               |                                                                     | NH <sub>4</sub> OH                                   | 100 mL   | 0.040   |       |           |

<sup>a</sup> calculated by XPS.

<sup>b</sup> calculated by ICP-MES.

<sup>c</sup> calculated by TG.

<sup>d</sup> calculated by EDX spectrum

**Table S12.** Estimated feasibility and sustainability of recently reported Fenton-like catalysts.

| Classification      | Catalysts                                              | Harmful solvents                   | Preparation procedures (steps) | Energy-intensive steps                                           | Ref.      |
|---------------------|--------------------------------------------------------|------------------------------------|--------------------------------|------------------------------------------------------------------|-----------|
| Metallic oxides     | C-CoCu-HNC <sup>a</sup>                                | methanol                           | 7                              | ultrasonication; high-speed centrifugation                       | 31        |
|                     | Co(II) doped TiO <sub>2</sub> <sup>a</sup>             | glycerol                           | 4                              | centrifugation                                                   | 14        |
|                     | CoFe <sub>2</sub> O <sub>4</sub> /TNTs <sup>c</sup>    | Ethanol; NaOH solution (10 M)      | 7                              | Centrifugation; ultrasonication; evaporation; calcined at 350 °C | 9         |
|                     | Co-HAP-2 <sup>b</sup>                                  | -                                  | 4                              | Oven drying; calcined at 500 °C                                  | 20        |
|                     | Cal-ZIF-67/AC <sup>b</sup>                             | methanol                           | 5                              | Ultrasonication; centrifugation; calcined at 500 °C              | 11        |
| Metal/carbon hybrid | AgBiO <sub>3</sub> /GO/NCDs-2 <sup>b</sup>             | ethanol                            | 9                              | freeze-drying; centrifugation                                    | 13        |
|                     | 30%-CNTs-Fe-Mn-0.5 <sup>b</sup>                        | Acetone; HNO <sub>3</sub> solution | 6                              | evaporation; oven drying                                         | 17        |
| Metal cluster       | C-Co@SMR-900                                           | -                                  | 4                              | freeze-drying; calcined at 900 °C                                | This work |
|                     | I-FeN <sub>x</sub> /g-C <sub>3</sub> N <sub>4</sub> -5 | Methanol; ethanol                  | 6                              | Centrifugation; ball milling; oven drying; calcined at 600 °C;   | 21        |
| Single atom         | Cu-C <sub>3</sub> N <sub>4</sub>                       | -                                  | 2                              | calcined at 560 °C                                               | 22        |

---

|            |                           |                                                               |   |                                    |    |
|------------|---------------------------|---------------------------------------------------------------|---|------------------------------------|----|
| Metal-free | NH <sub>3</sub> -S600-KOH | KOH solution<br>(0.5 M); NH <sub>4</sub> OH<br>solution (7 M) | 4 | Oven drying;<br>calcined at 600 °C | 12 |
|------------|---------------------------|---------------------------------------------------------------|---|------------------------------------|----|

---

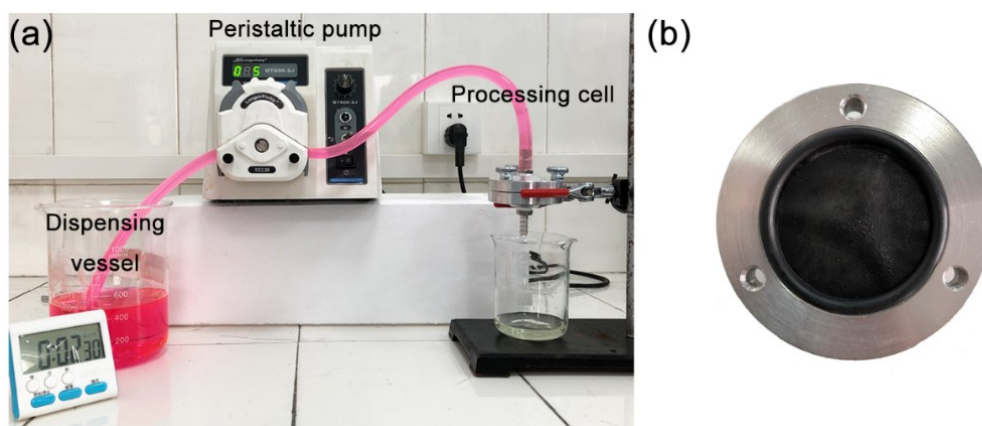

**Fig. S29** (a) Photograph of the experimental setup. (b) Photograph of the C-Co@SMR-900/PVDF composite membrane loaded processing cell.



## References

1. S. Huang, Y. Meng, S. He, A. Goswami, Q. Wu, J. Li, S. Tong, T. Asefa and M. Wu, *Adv. Funct. Mater.*, 2017, **27**, 1606585.
2. X. Li, X. Huang, S. Xi, S. Miao, J. Ding, W. Cai, S. Liu, X. Yang, H. Yang, J. Gao, J. Wang, Y. Huang, T. Zhang and B. Liu, *J. Am. Chem. Soc.*, 2018, **140**, 12469-12475.
3. Y. Wang, C. Liu, Y. Zhang, W. Meng, B. Yu, S. Pu, D. Yuan, F. Qi, B. Xu and W. Chu, *Appl. Catal., B*, 2018, **235**, 264-273.
4. M. M. Mian, G. Liu, B. Fu and Y. Song, *Appl. Catal., B*, 2019, **255**, 117765.
5. R. Guo, Y. Wang, J. Li, X. Cheng and D. D. Dionysiou, *Appl. Catal., B*, 2020, **278**, 119297.
6. S. Guo, H. Wang, W. Yang, H. Fida, L. You and K. Zhou, *Appl. Catal., B*, 2020, **262**, 118250.
7. L. Jiang, Y. Zhang, M. Zhou, L. Liang and K. Li, *J. Hazard. Mater.*, 2018, **358**, 53-61.
8. L. Zeng, L. Xiao, X. Shi, M. Wei, J. Cao and Y. Long, *J. Colloid Interface Sci.*, 2019, **534**, 586-594.
9. Y. Du, W. Ma, P. Liu, B. Zou and J. Ma, *J. Hazard. Mater.*, 2016, **308**, 58-66.
10. P. Shao, X. Duan, J. Xu, J. Tian, W. Shi, S. Gao, M. Xu, F. Cui and S. Wang, *J. Hazard. Mater.*, 2017, **322**, 532-539.
11. Y. Li, X. Yan, X. Hu, R. Feng and M. Zhou, *Chem. Eng. J.*, 2019, **375**, 122003.
12. M. M. Mian and G. Liu, *Chem. Eng. J.*, 2020, **392**, 123681.
13. X. Yue, X. Miao, X. Shen, Z. Ji, H. Zhou, Y. Sun, K. Xu, G. Zhu, L. Kong, Q. Chen, N. Li and X. He, *J. Colloid Interface Sci.*, 2019, **540**, 167-176.
14. H. Wang, Q. Gao, H. Li, B. Han, K. Xia and C. Zhou, *Chem. Eng. J.*, 2019, **368**, 377-389.
15. L. Wang, X. Guo, Y. Chen, S. Ai and H. Ding, *Appl. Surf. Sci.*, 2019, **467**, 954-962.
16. Z.-S. Zhu, J. Qu, S.-M. Hao, S. Han, K.-L. Jia and Z.-Z. Yu, *ACS Appl. Mater. Interfaces*, 2018, **10**, 30670-30679.
17. X. Tian and L. Xiao, *J. Colloid Interface Sci.*, 2020, **580**, 803-813.
18. L. Ge, Z. Peng, W. Wang, F. Tan, X. Wang, B. Su, X. Qiao and P. K. Wong, *J. Mater. Chem. A*, 2018, **6**, 16421-16429.
19. D. Pan, F. Mou, X. Li, Z. Deng, J. Sun, L. Xu and J. Guan, *J. Mater. Chem. A*, 2016, **4**, 11768-11774.
20. Y. Pang, L. Kong, D. Chen, G. Yuvaraja and S. Mehmood, *J. Hazard. Mater.*, 2020, **384**, 121447.
21. S. An, G. Zhang, T. Wang, W. Zhan, K. Li, C. Song, J. T. Miller, S. Miao, J. Wang and X. Guo, *ACS Nano*, 2018, **12**, 9441-9450.
22. J. Xu, X. Zheng, Z. Feng, Z. Lu, Z. Zhang, W. Huang, Y. Li, D. Vuckovic, Y. Li, S. Dai, G. Chen, K. Wang, H. Wang, J. K. Chen, W. Mitch and Y. Cui, *Nat. Sustainability*, 2021, **4**, 233-241.
23. M. Wang, Q. Gao, M. Zhang, Y. He, Y. Zhang, R. Shen, J. Hu and G. Wu, *J. Mater. Chem. A*, 2021, **9**, 2308-2318.

24. H. Jiang, C. Q. Zhu, Y. Yuan, C. L. Yue, C. Ling, F. Q. Liu and A. M. Li, *Chem. Eng. J.*, 2020, **384**, 123302.
25. Y. Zhou, X. L. Wang, C. Y. Zhu, D. D. Dionysiou, G. C. Zhao, G. D. Fang and D. M. Zhou, *Water Res.*, 2018, **142**, 208-216.
26. W. Q. Li, S. Q. Li, Y. Tang, X. L. Yang, W. X. Zhang, X. D. Zhang, H. X. Chai and Y. M. Huang, *J. Hazard. Mater.*, 2020, **389**, 121856.
27. S. Z. Wang and J. L. Wang, *Chem. Eng. J.*, 2020, **385**, 123933.
28. G. X. Zhu, J. L. Zhu, Q. Liu, X. L. Fu, Z. Y. Chen, K. Li, F. Y. Cao, Q. Qin and M. L. Jiao, *Phys. Chem. Chem. Phys.*, 2021, **23**, 5283-5297.
29. S. Z. Wang, H. Y. Liu and J. L. Wang, *J. Hazard. Mater.*, 2020, **387**, 121669.
30. C. Q. Zhu, F. Q. Liu, C. Ling, H. Jiang, H. D. Wu and A. M. Li, *Appl. Catal., B*, 2019, **242**, 238-248.
31. S. Li, Y. Hou, Q. Chen, X. Zhang, H. Cao and Y. Huang, *ACS Appl. Mater. Interfaces*, 2020, **12**, 2581-2590.
